# Supplementary material for: One-pot synthesis of metal–organic framework@SiO2 core–shell nanoparticles with enhanced visible-light photoactivity
Source: Royal Society of Chemistry journal article supplement (doi:10.1039/c3dt50845e), 2013-01-01
Supplement: c3dt50845e.pdf [file c3dt50845e.pdf]

Electronic Supplementary Information for

## One-pot synthesis of metal-organic framework@SiO<sub>2</sub> core-shell nanoparticles with enhanced visible-light photoactivity

Zong-Qun Li,<sup>a</sup> Ai Wang,<sup>a</sup> Chun-Yan Guo,<sup>a</sup> Yan-Fang Tai<sup>a</sup> and Ling-Guang Qiu<sup>\*b</sup>

<sup>a</sup> Department of Applied Chemistry and Environmental Engineering, Bengbu College, Bengbu 233000, P. R. China

<sup>b</sup> Laboratory of Advanced Porous Materials, School of Chemistry and Chemical Engineering, Anhui University, Hefei 230039, China;

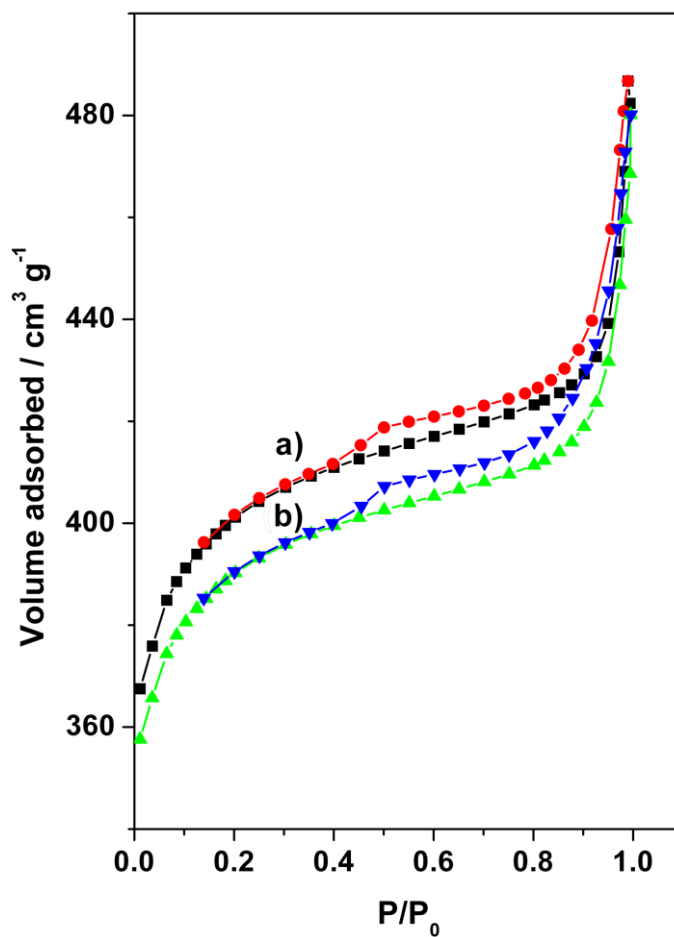

Fig. S1 Nitrogen adsorption-desorption isotherms of pure Cu<sub>3</sub>(BTC)<sub>2</sub> (a) and Cu<sub>3</sub>(BTC)<sub>2</sub>@SiO<sub>2</sub> core-shell nanoparticles with reaction time 2.5 h (b).

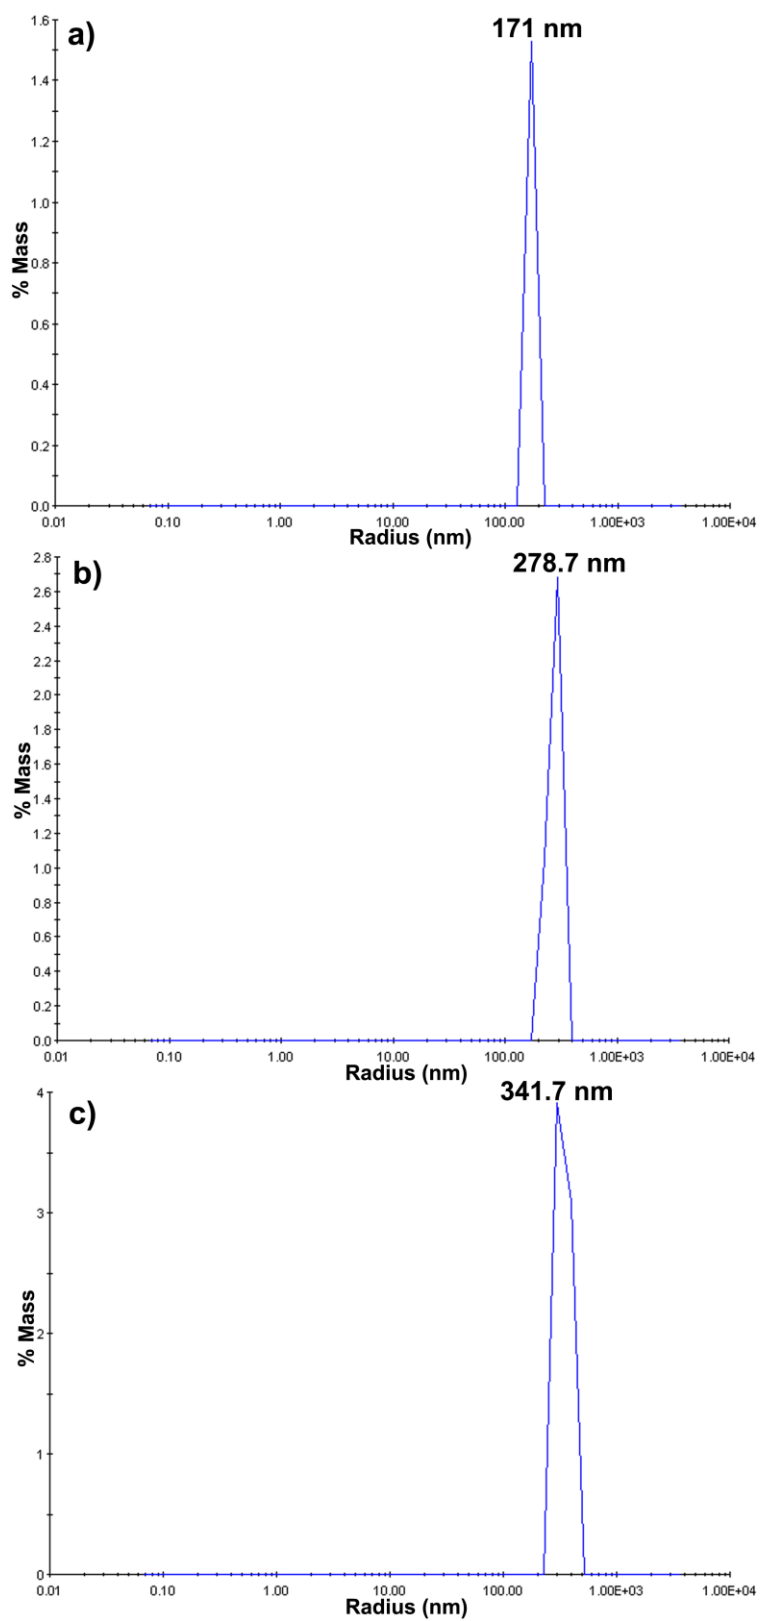

Fig. S2 Dynamic light scattering data of  $\text{Cu}_3(\text{BTC})_2@ \text{SiO}_2$  core-shell nanoparticles with reaction time (a) 1.5 h, (b) 2 h, (c) 2.5 h, respectively.

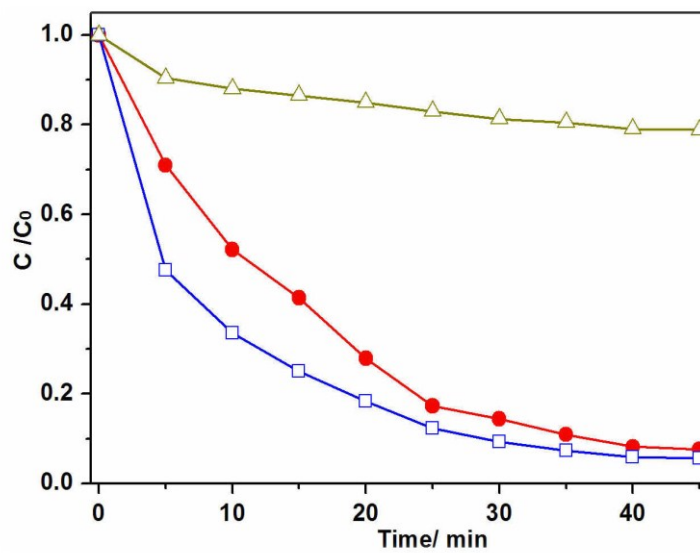

Fig. S3 The effect of different electron acceptor additives on the phenol photodegradation with the presence of Film 2.5 h under the visible light irradiation, ( $\Delta$ )  $KBrO_3$ , ( $\bullet$ )  $H_2O_2$ , ( $\square$ )  $(NH_4)_2S_2O_8$ , respectively.
